# Supplementary material
Source: MDPI journal article supplement (https://www.mdpi.com/1424-8247/15/10/1240)
Supplement: s1 [file s1]

# Cu(II) catalysed hydrocarboxylation of imines utilizing CO<sub>2</sub> to synthesize $\alpha$ -unsaturated aminocarboxylic acids

Allen T. Gordon<sup>a\*</sup>, Eric C. Hosten<sup>a</sup>, Adeniyi S. Ogunlaja<sup>a\*</sup>

Department of Chemistry, Nelson Mandela University, Gqeberha (Port Elizabeth), South Africa

## Supplementary data section

### Synthesis of 1,3-dimethyl-2-phenyl-2,3-dihydro-1H-benzo[d]imidazole (BIH)

BIH was synthesized from a modified method based on the literature [1] in a twostep pathway. Firstly, 2-phenylbenzimidazole (3 g, 15.45 mmol) in a round bottomed flask was treated with methyl iodide (8 g, 56.36 mmol) in MeOH (20 mL) and NaOH (0.64 g, 16 mmol). The reflux apparatus was connected then the mixture heated at 110 °C for 24 h to give a faint yellow precipitate, which was filtered off, washed with excess water, and dried to give BIH<sup>+</sup>I<sup>-</sup>. Yield (3.2 g, 58.9%). The obtained product was used without further purification in the second step. Secondly, BIH<sup>+</sup>I<sup>-</sup> (1.5 g, 4.28 mmol) was suspended in MeOH (57 mL) and the mixture was degassed using N<sub>2</sub> and cooled to 0°C in an ice-water bath. Then NaBH<sub>4</sub> (405 mg, 10.7 mmol) in small portions was added. After completion of borohydride addition, the reaction mixture was left to warm to RT and stirred for 3 h under inert atmosphere. The reaction mixture was concentrated in vacuo, then 50 mL of water added and extracted by ether (3 x 25 mL). The organic extract was washed with water (10 mL), brine (20 mL), dried over Na<sub>2</sub>SO<sub>4</sub>, filtered, and evaporated in vacuo to dryness. The residue was dissolved in 2:1 EtOH-H<sub>2</sub>O (40 mL) at 75°C, filtered through cotton wool while hot and then slowly cooled to room temperature. The crystals were filtered and dried in high vacuum.

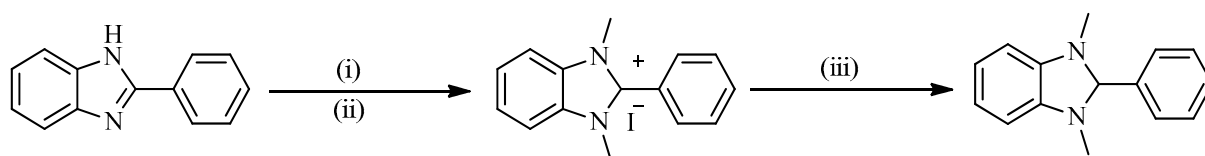

*Reagents and conditions:* (i) MeI, NaOH (ii) MeOH,  $\Delta$ , H<sub>2</sub>O (iii) NaBH<sub>4</sub>, N<sub>2</sub>, EtOH

**Scheme S1:** Synthesis of 1,3-dimethyl-2-phenyl-2,3-dihydro-1H-benzo[d]imidazole (BIH)

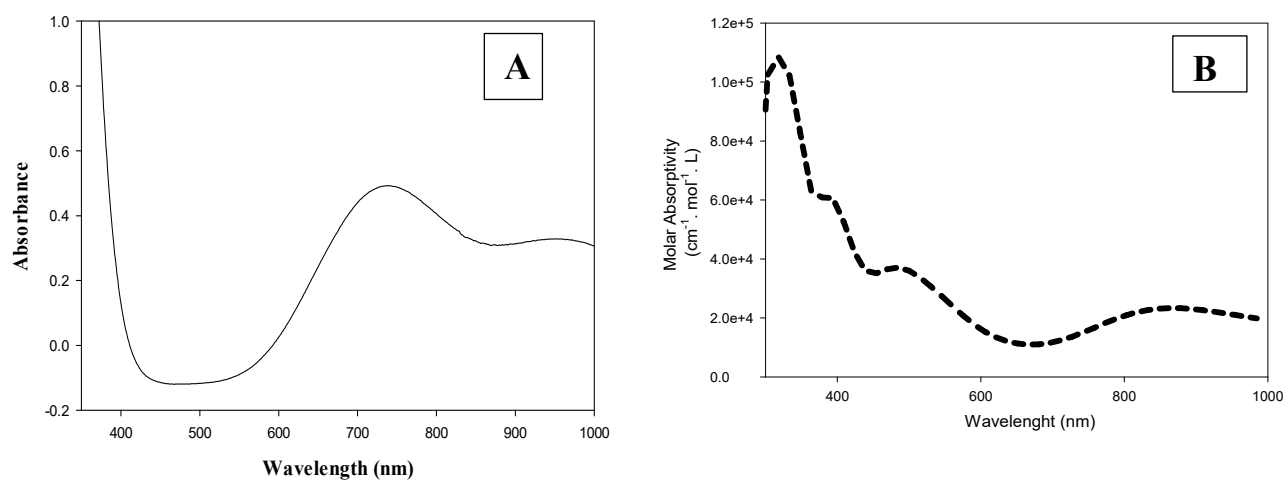

**Figure S1:** UV-Vis spectrum of CAT, (A) Experimental and (B) Theoretical (at B3LYP/LanL2DZ)

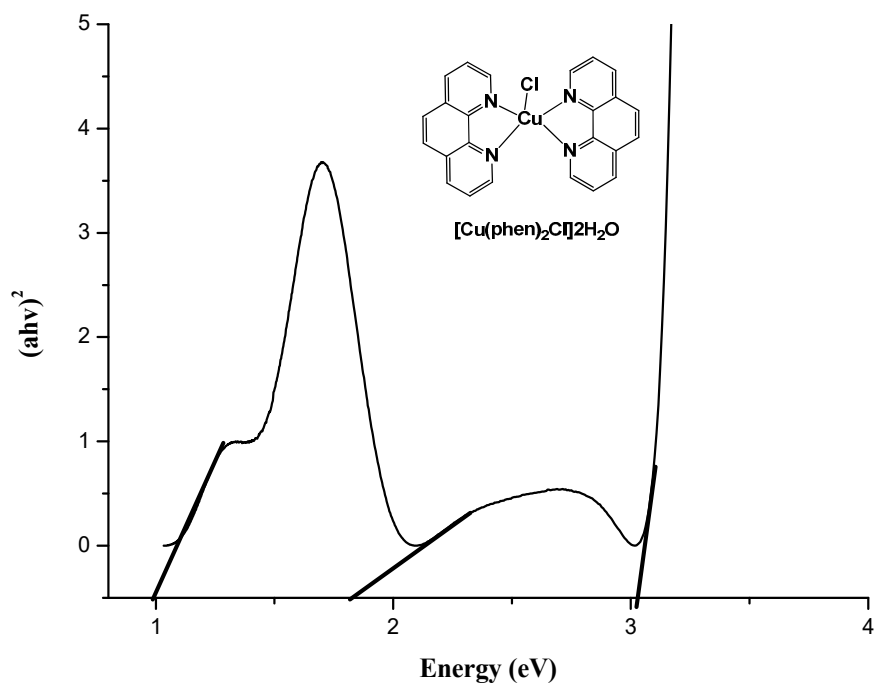

**Figure S2:**  $E_g$  value for CAT obtained from a UV-Vis spectrum

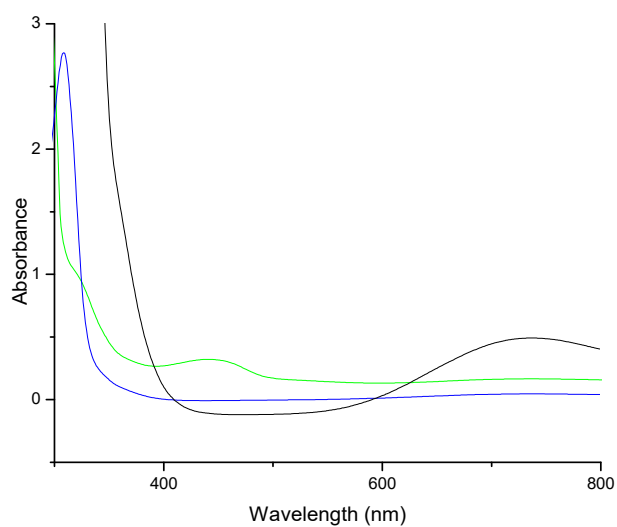

Re: (Black cat before irradiation), blue (cat +BIH) and yellow (Cat+CyNMe<sub>2</sub>)

**Figure S3:** UV-Vis spectrum of photocatalyst and additives (BIH and CyNMe<sub>2</sub>)

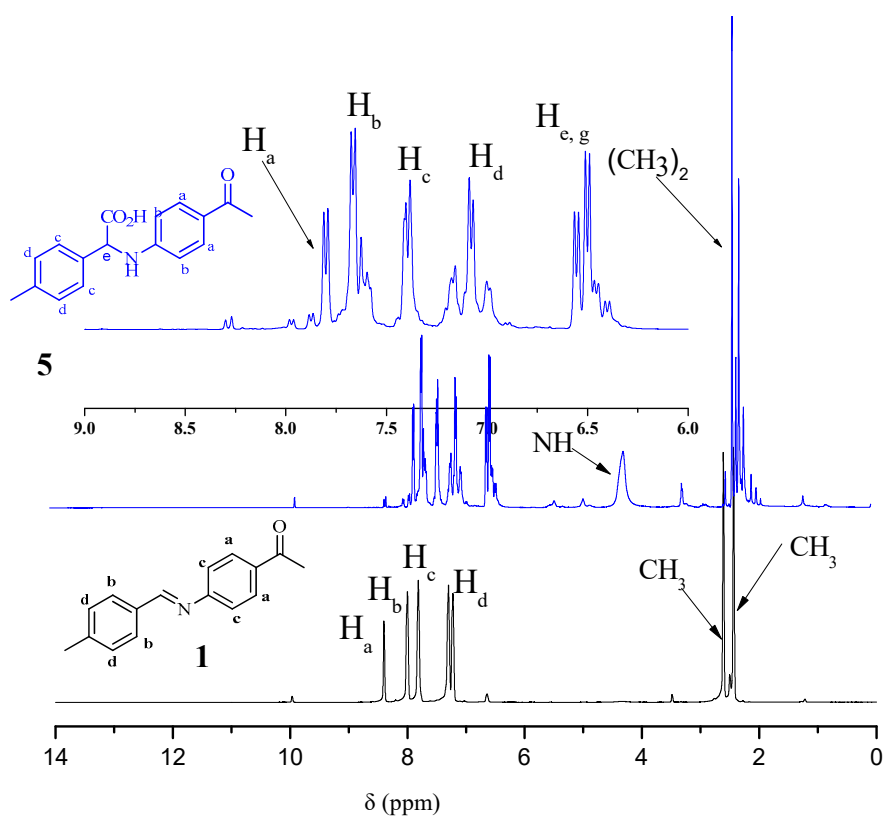

**Figure S4:** <sup>1</sup>H NMR spectrum of **1** and product **HYD1** obtained after irradiation with CO<sub>2</sub>

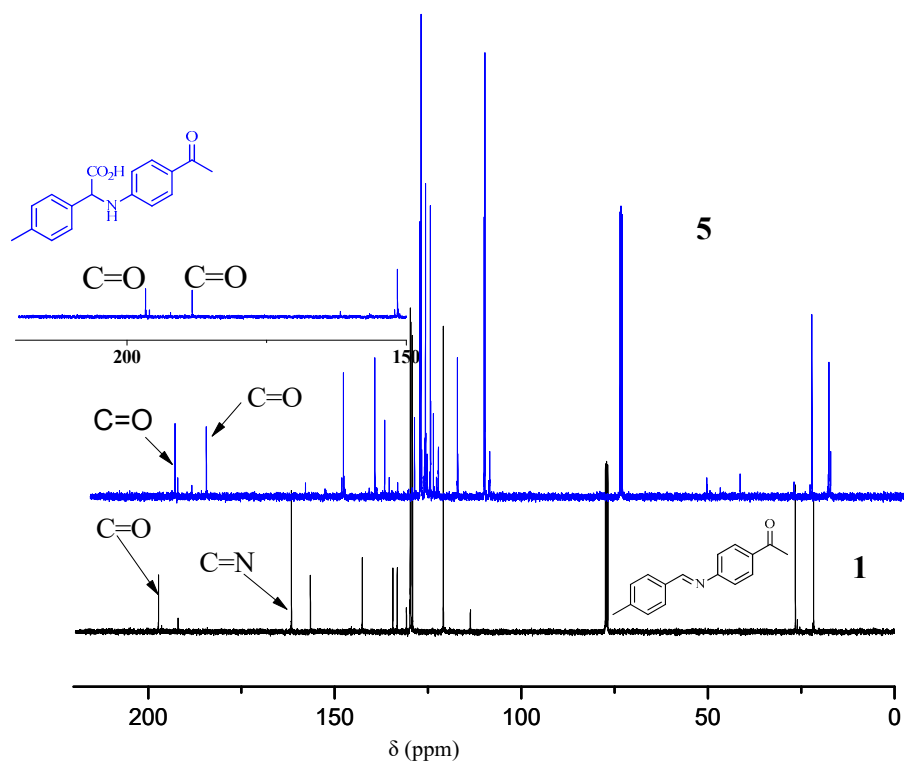

**Figure S5:**  $^{13}\text{C}$  NMR spectrum of **1** and product **HYD1** obtained after irradiation with  $\text{CO}_2$

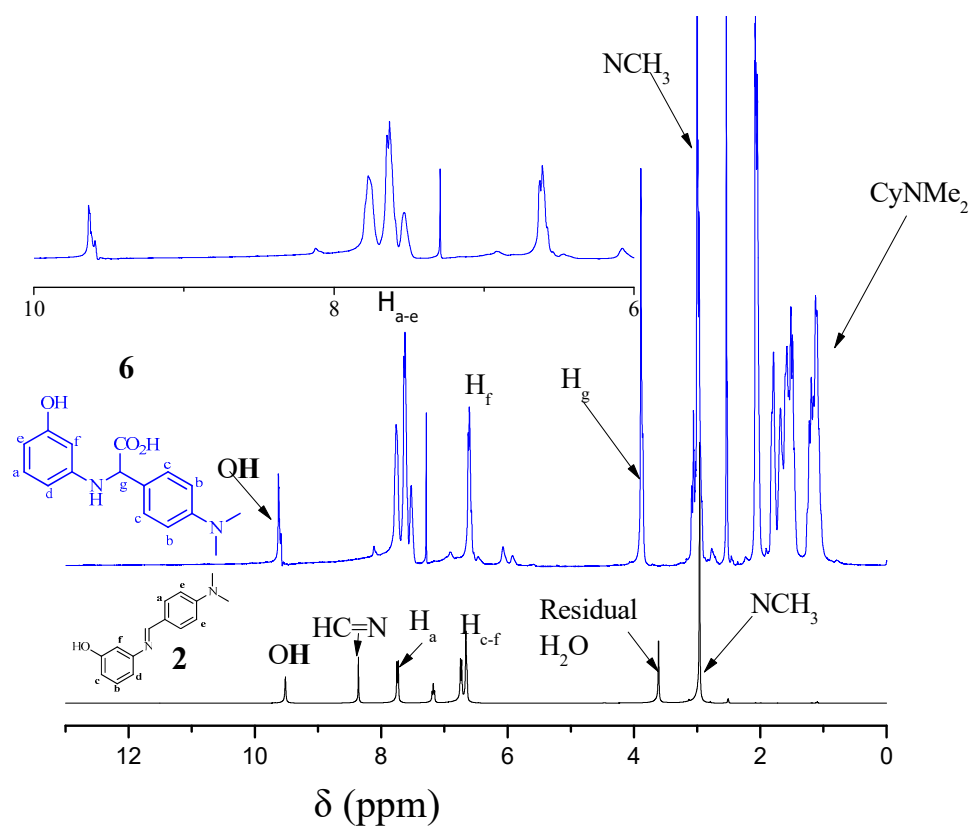

**Figure S6:**  $^1\text{H}$  NMR spectrum of **2** and product **6** obtained after irradiation with  $\text{CO}_2$

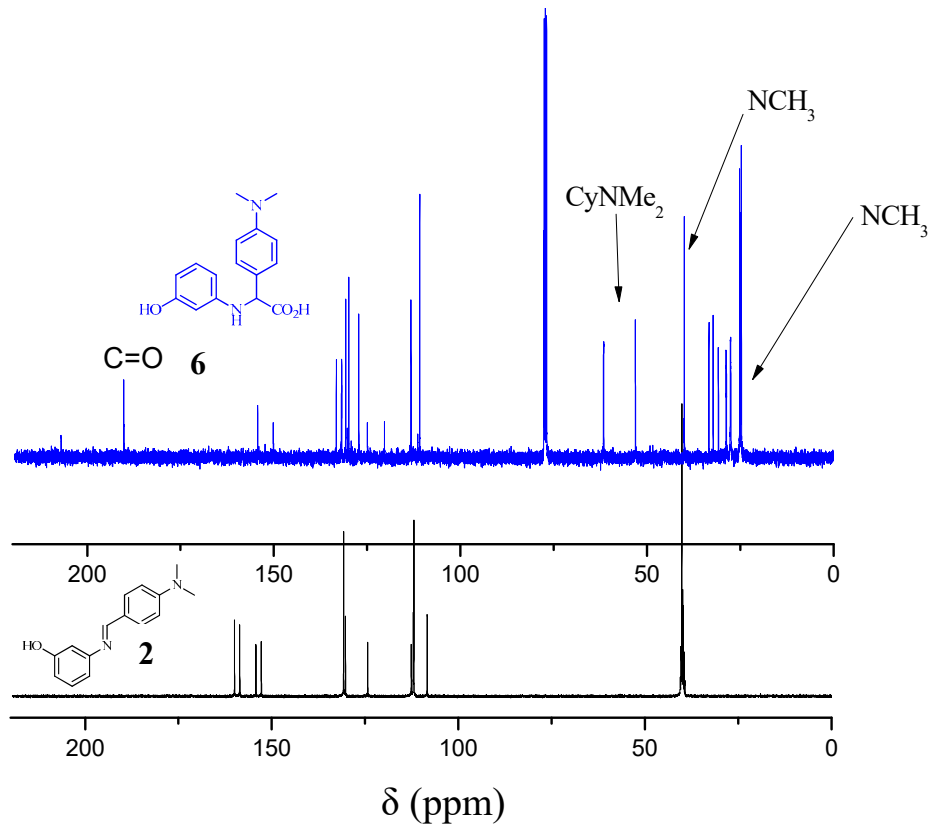

**Figure S7:**  $^{13}\text{C}$  NMR spectrum of **2** and product **6** obtained after irradiation with  $\text{CO}_2$

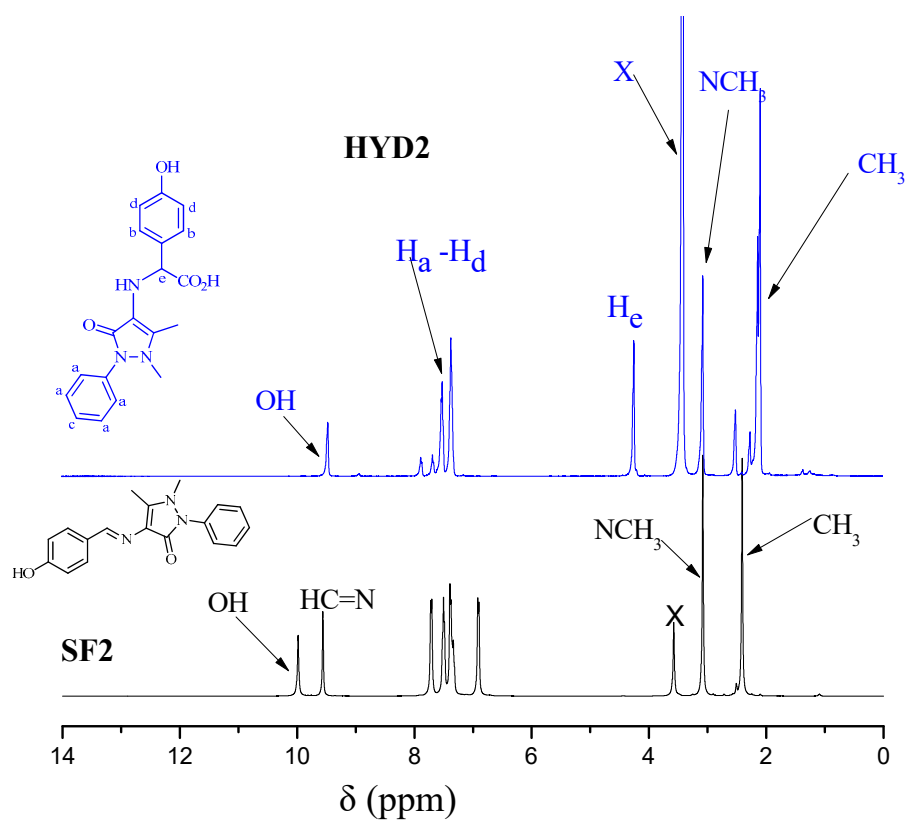

**Figure S8:**  $^1\text{H}$  NMR spectrum of **3** and product **7** obtained after irradiation with  $\text{CO}_2$

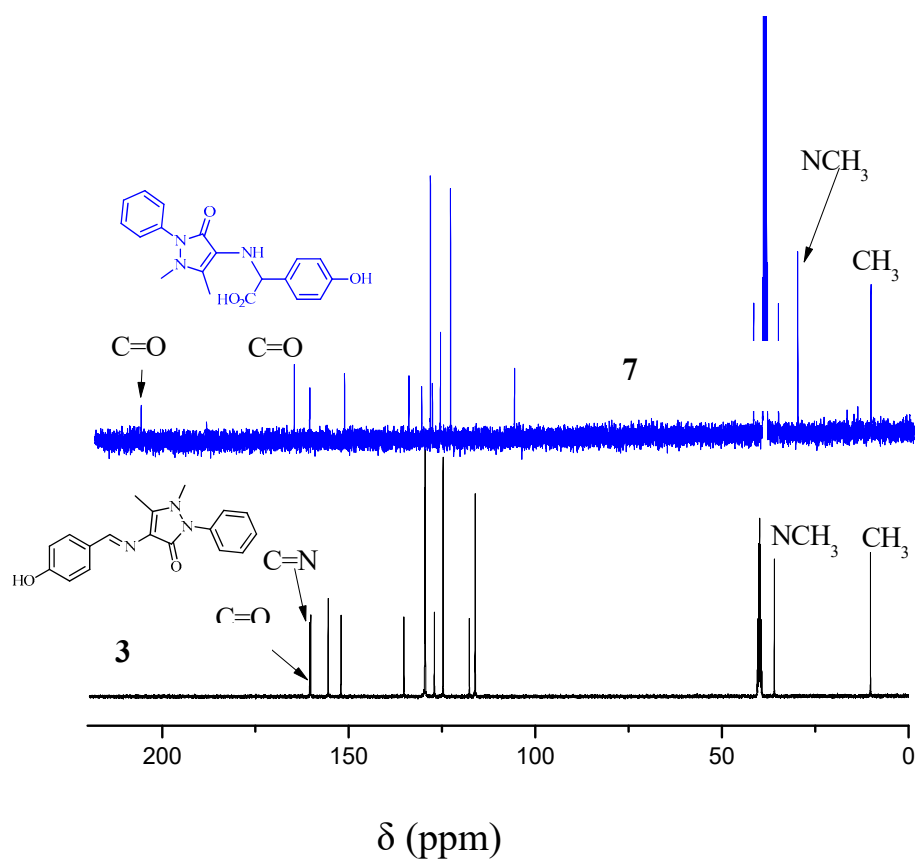

**Figure S9:**  $^{13}\text{C}$  NMR spectrum of **3** and product (**7**) obtained after irradiation with  $\text{CO}_2$

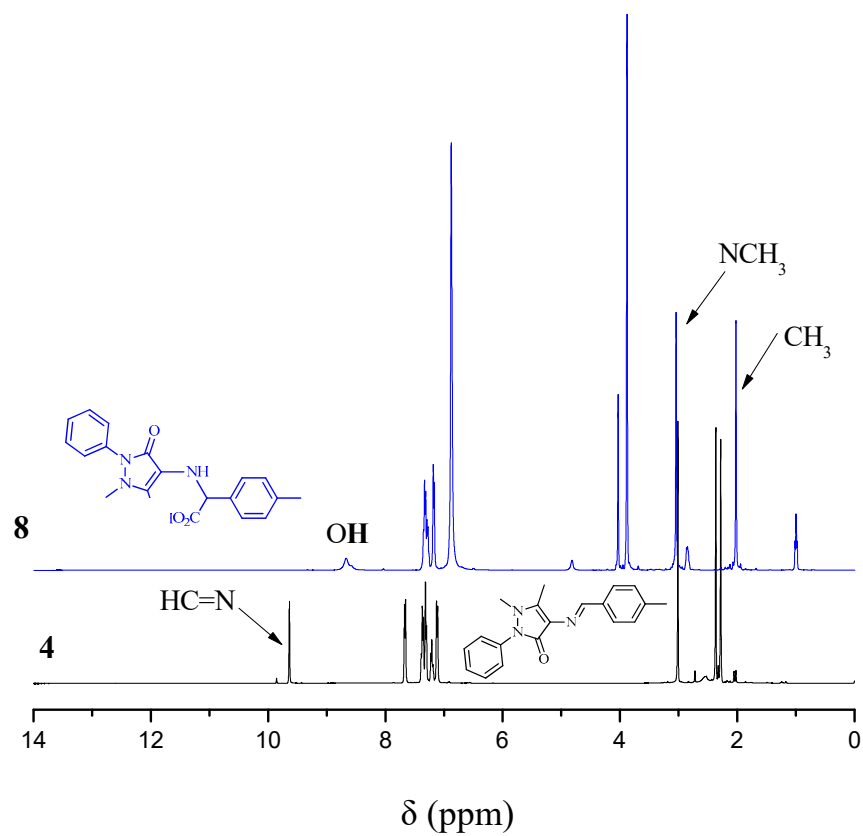

**Figure S10:**  $^1\text{H}$  NMR spectrum of **4** and product **8** obtained after irradiation with  $\text{CO}_2$



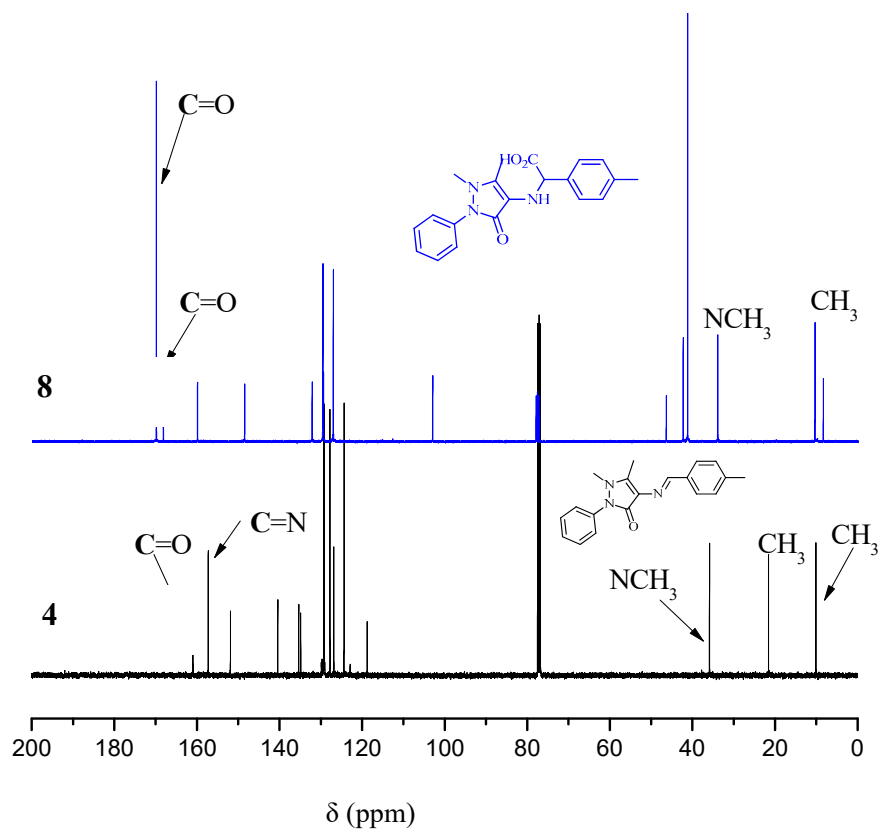

**Figure S11:**  $^{13}\text{C}$  NMR spectrum of **4** and product **8** obtained after irradiation with  $\text{CO}_2$

## Molecular Docking

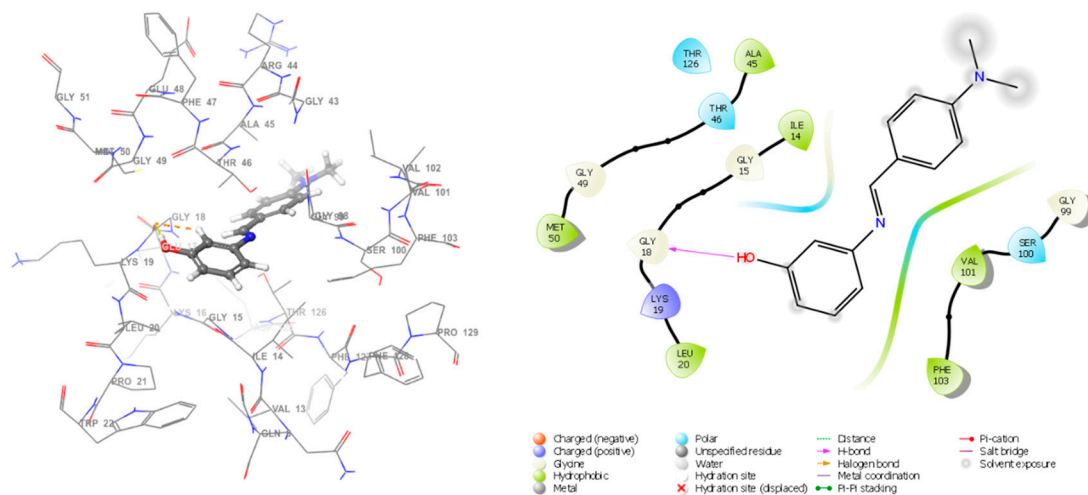

**Figure S12:** The 3D binding model of **2** with 4M7U (A), 2D diagram of **2** and interacting residues (B)

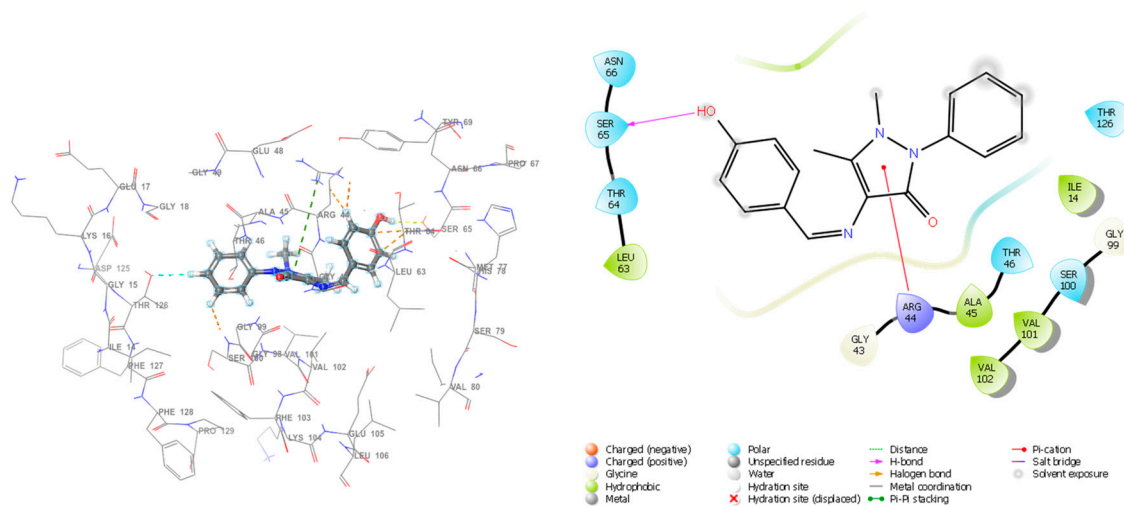

**Figure S13:** The 3D binding model of **3** with 4M7U (A), 2D diagram of **3** and interacting residues (B)

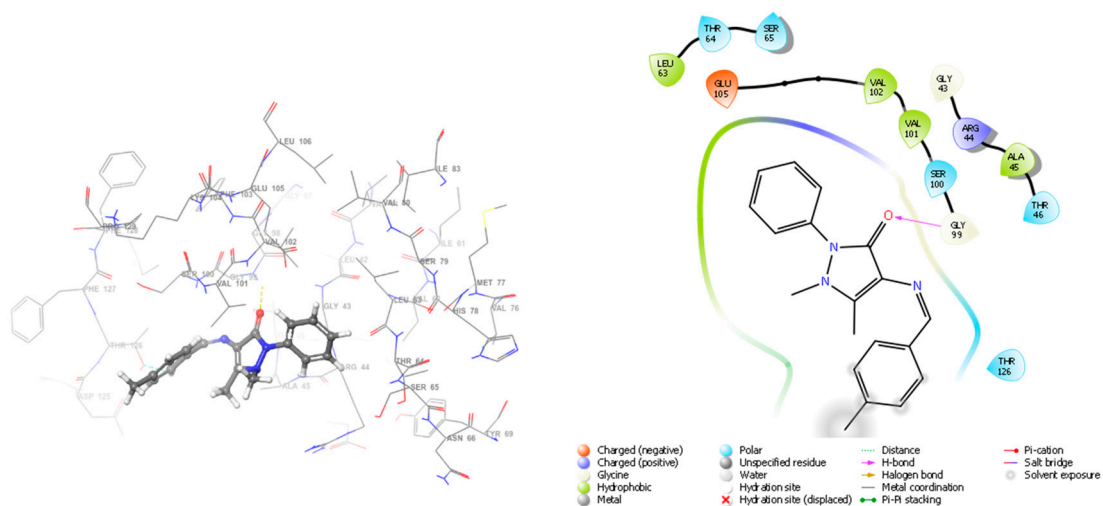

**Figure S14:** The 3D binding model of **4** with 4M7U (A), 2D diagram of **4** and interacting residues (B)

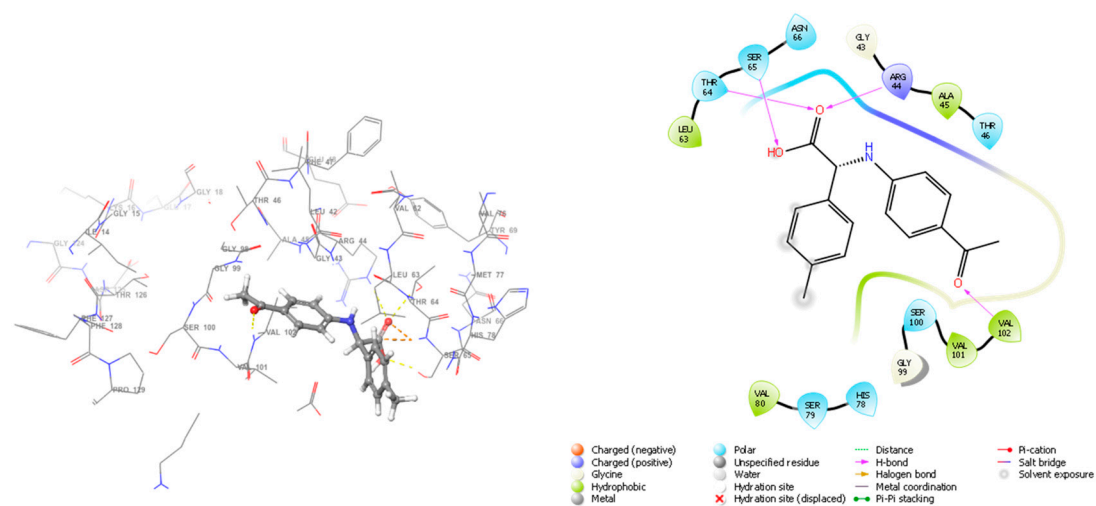

**Figure S15:** The 3D binding model of **5** with 4M7U (A), 2D diagram of **5** and interacting residues (B)

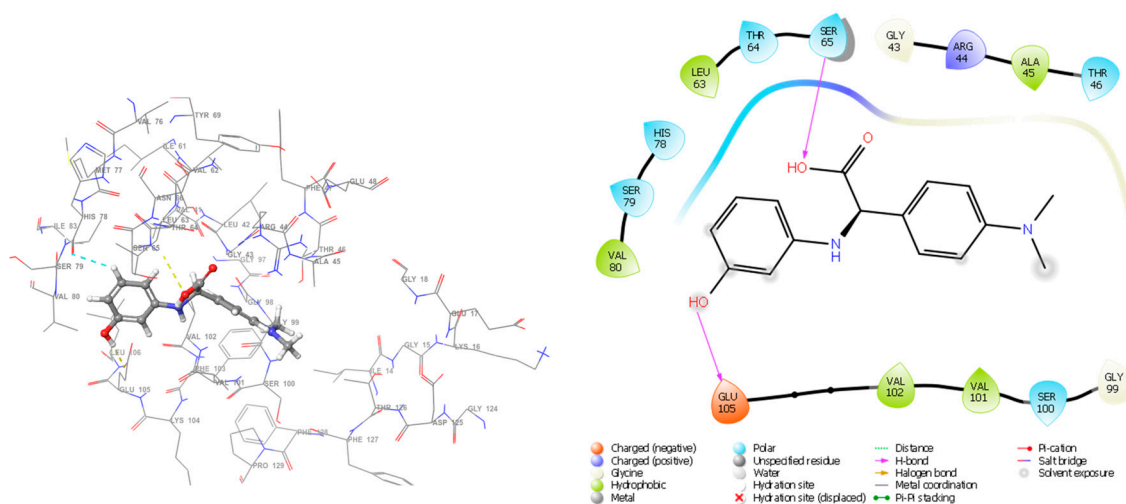

**Figure S16:** The 3D binding model of **6** with 4M7U (A), 2D diagram of **6** and interacting residues (B)

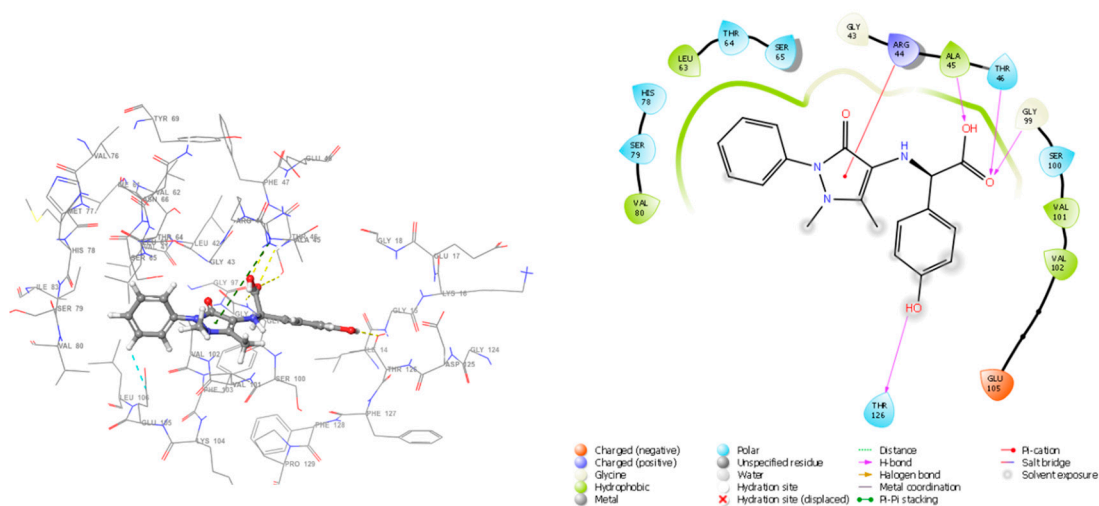

**Figure S17:** The 3D binding model of **7** with 4M7U (A), 2D diagram of **7** and interacting residues (B)



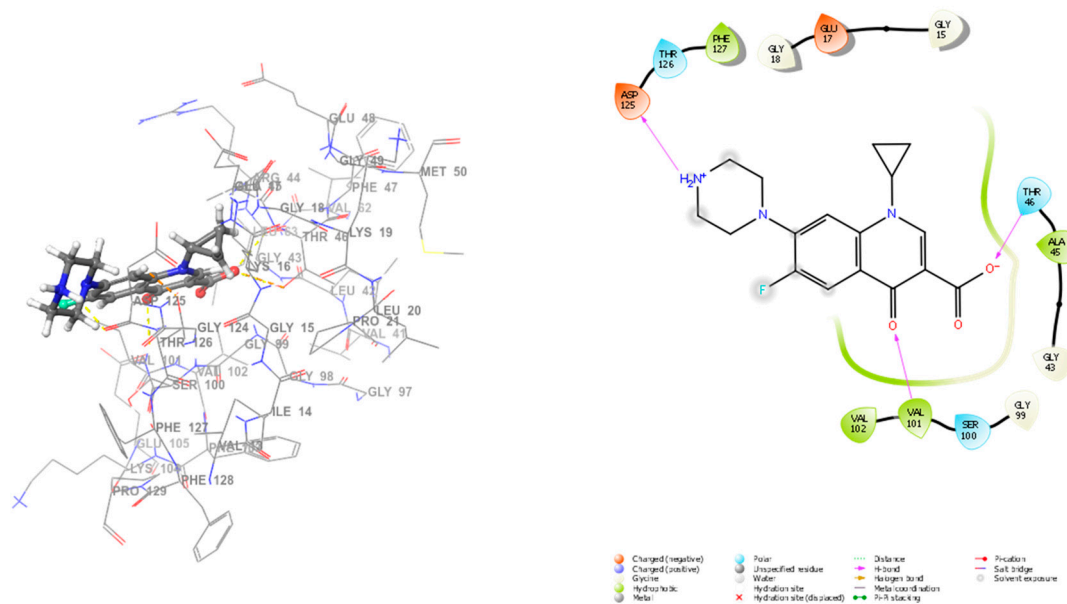

**Figure S20:** The 3D binding model of **Ciprofloxacin** with 4M7U (A), 2D diagram of **Ciprofloxacin** and interacting residues (B)

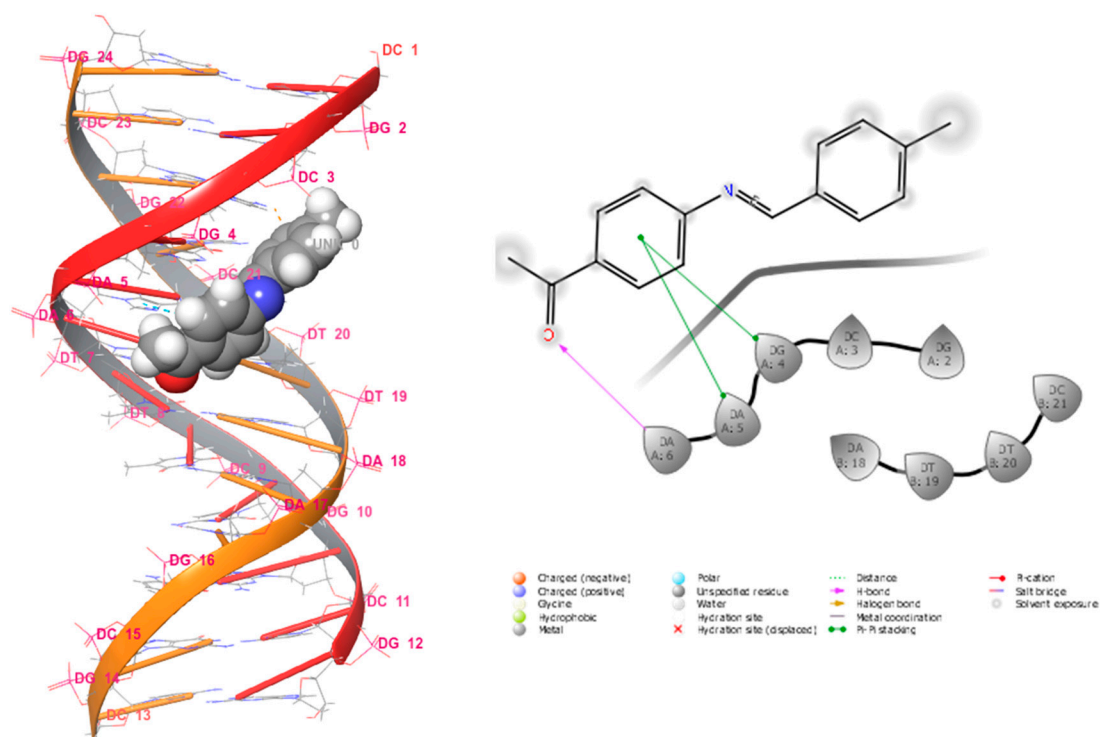

**Figure S21:** The 3D binding model of **1** with B-DNA dodecamer (1BNA) (A), 2D diagram of **1** and interacting residues (B)

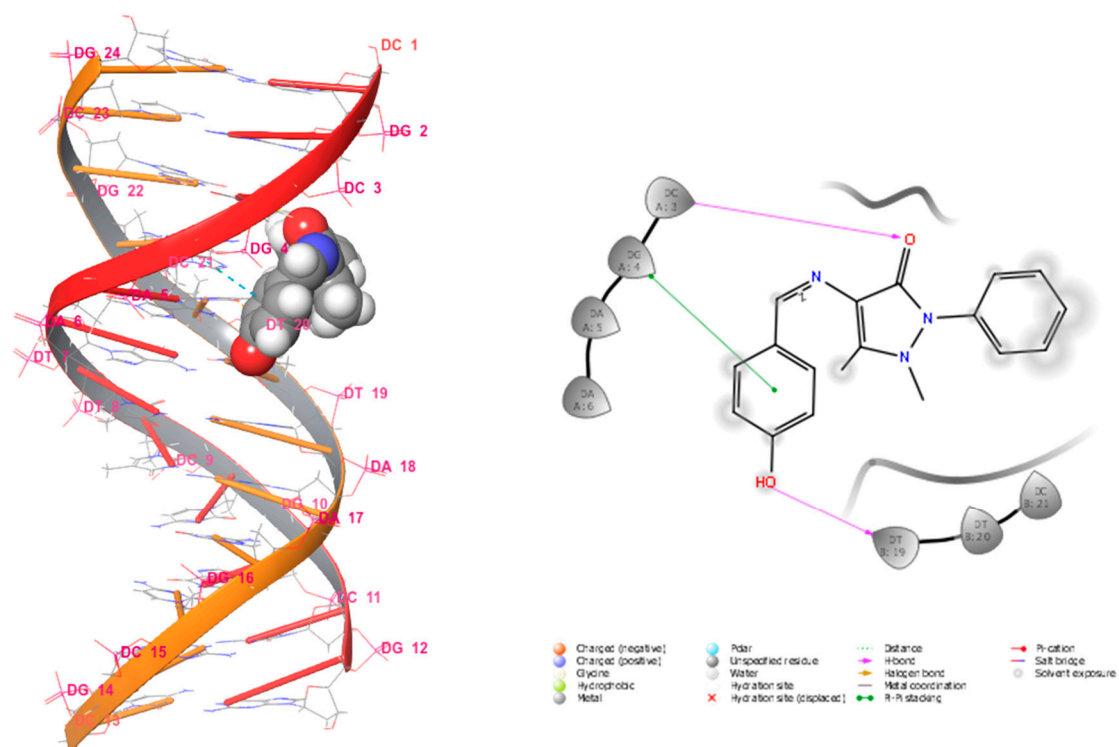

**Figure S22:** The 3D binding model of **3** with B-DNA dodecamer (1BNA) (A), 2D diagram of **3** and interacting residues (B)

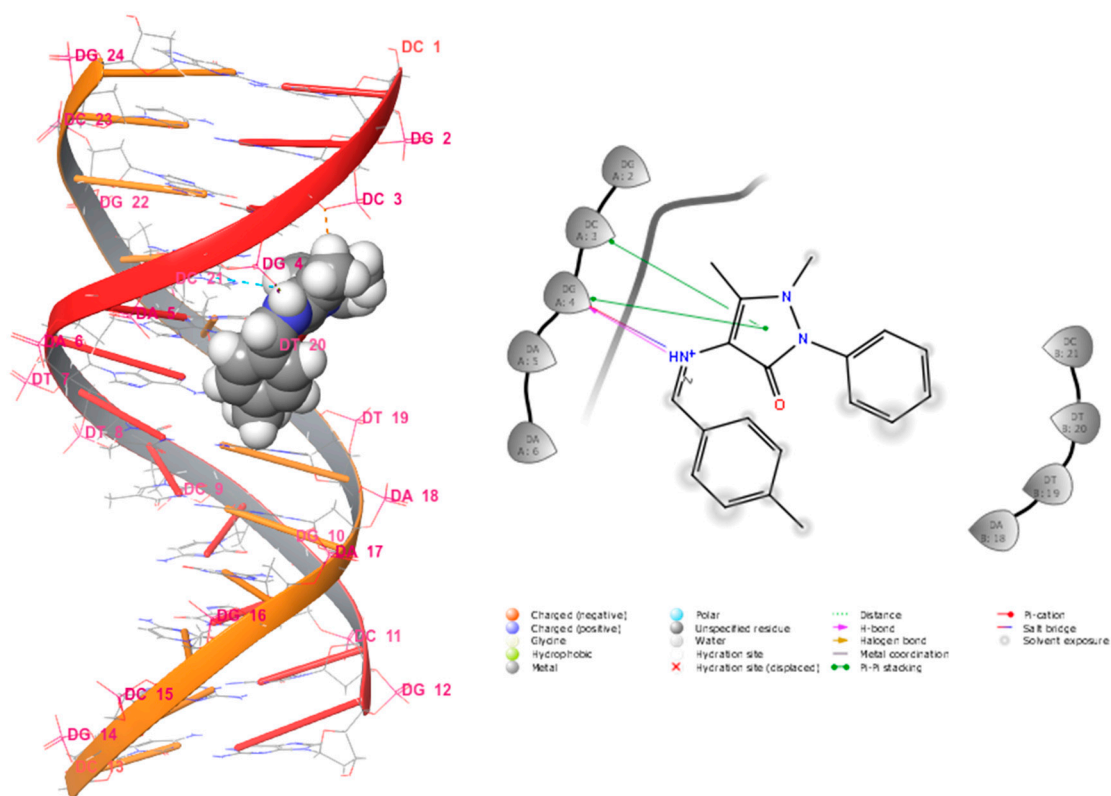



**Figure S23:** The 3D binding model of **4** with B-DNA dodecamer (1BNA) (A), 2D diagram of **4** and interacting residues (B)

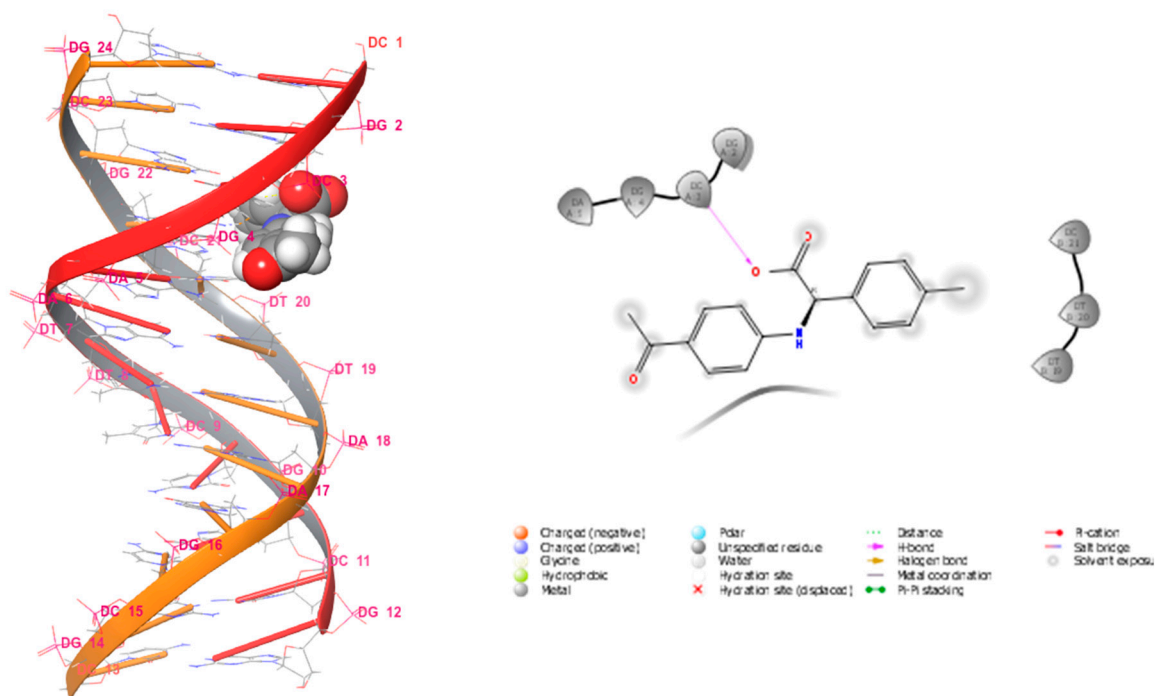

**Figure S24:** The 3D binding model of **5** with B-DNA dodecamer (1BNA) (A), 2D diagram of **1** and interacting residues (B)

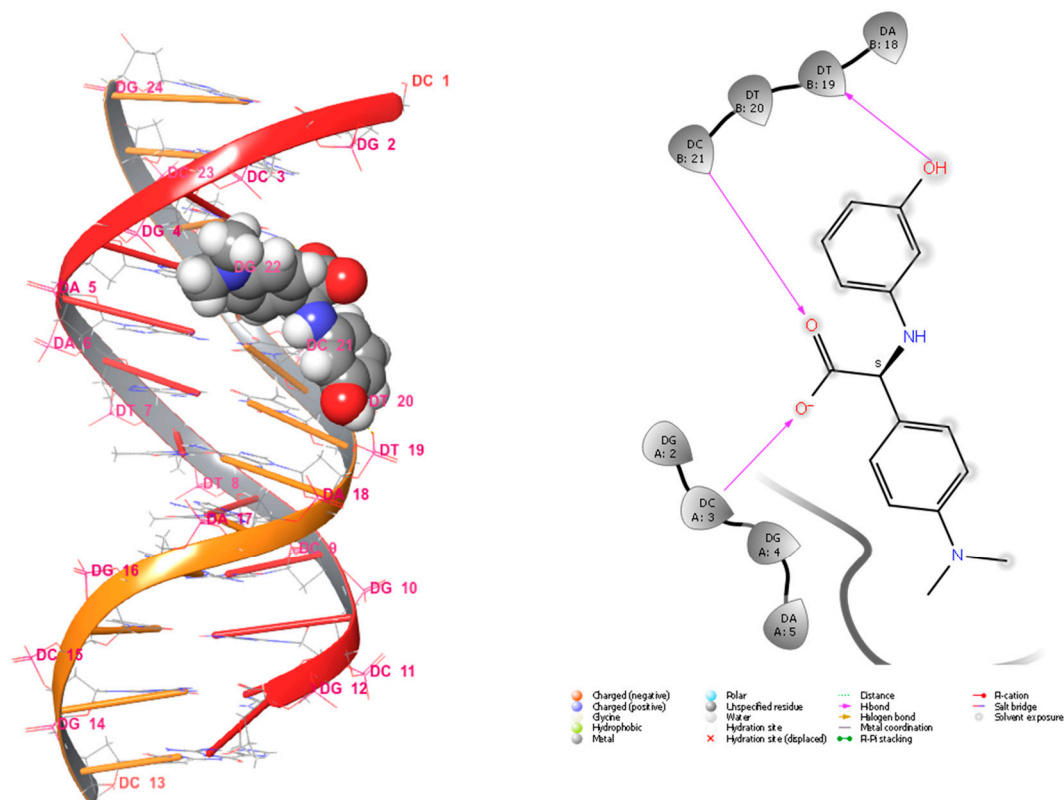



**Figure S25:** The 3D binding model of **6** with B-DNA dodecamer (1BNA) (A), 2D diagram of **6** and interacting residues (B)

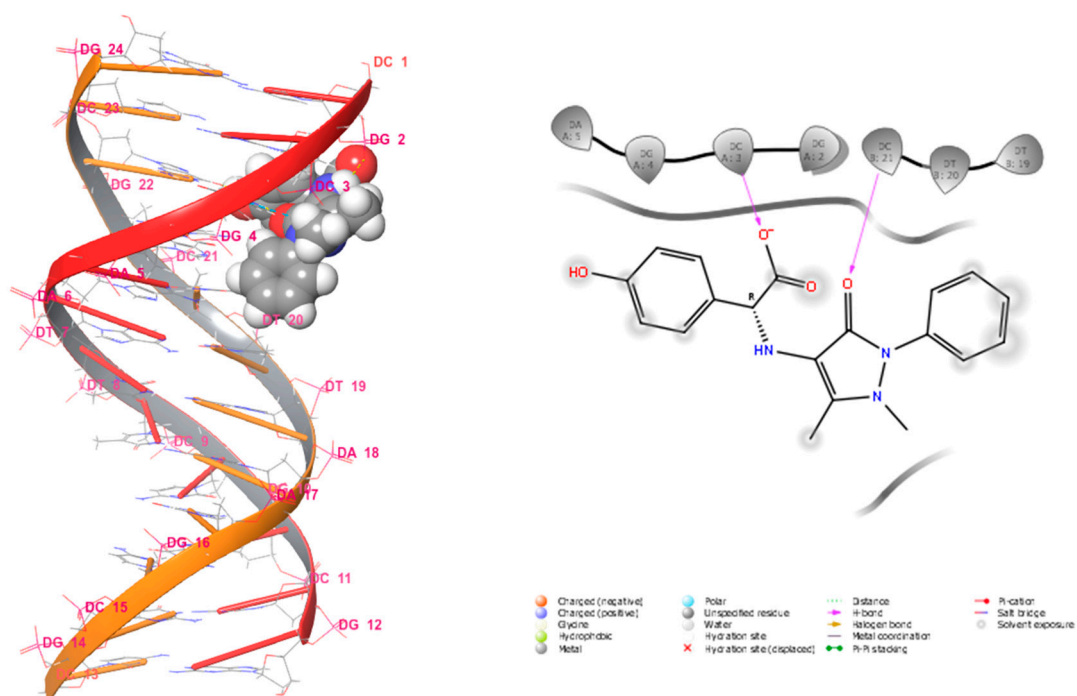

**Figure S26:** The 3D binding model of **7** with B-DNA dodecamer (1BNA) (A), 2D diagram of **7** and interacting residues (B)

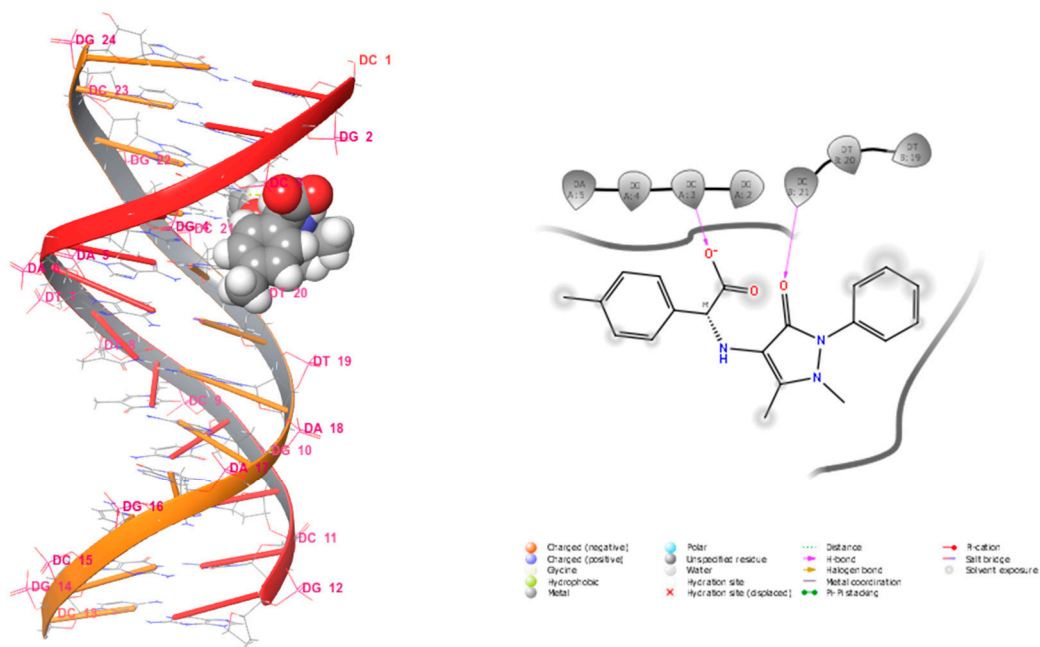

**Figure S27:** The 3D binding model of **8** with B-DNA dodecamer (1BNA) (A), 2D diagram of **8** and interacting residues (B)



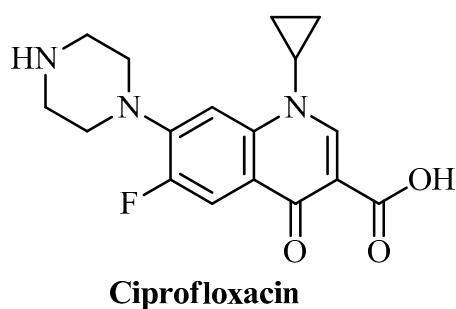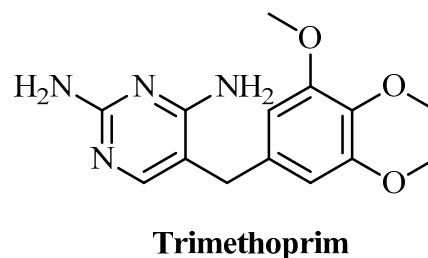

**Figure S30:** Structures of standard drugs

**Table S1:** Binding free energy components for the B-DNA dodecamer (1BNA)-ligand complexes calculated by MM-GBSA

| Ligands                                                      | B-DNA DODECAMER (1BNA)   |                          |                         |                           |                          |                           |                              |                         |
|--------------------------------------------------------------|--------------------------|--------------------------|-------------------------|---------------------------|--------------------------|---------------------------|------------------------------|-------------------------|
|                                                              | (kcal/mol)               |                          |                         |                           |                          |                           |                              |                         |
|                                                              | $\Delta G_{\text{bind}}$ | $\Delta G_{\text{Coul}}$ | $\Delta G_{\text{cov}}$ | $\Delta G_{\text{Hbond}}$ | $\Delta G_{\text{Pack}}$ | $\Delta G_{\text{lipho}}$ | $\Delta G_{\text{Solv\_GB}}$ | $\Delta G_{\text{vdW}}$ |
| <b>Schiff Bases</b>                                          |                          |                          |                         |                           |                          |                           |                              |                         |
| <b>1</b>                                                     | -18.56                   | -5.11                    | 2.16                    | 0.00                      | 0.00                     | -6.25                     | 16.22                        | -25.57                  |
| <b>2</b>                                                     | -35.43                   | -456.96                  | 5.65                    | 0.00                      | 0.00                     | -8.24                     | 439.88                       | -15.76                  |
| <b>3</b>                                                     | -22.71                   | -24.63                   | -0.07                   | 0.00                      | 0.00                     | -6.63                     | 27.10                        | -18.48                  |
| <b>4</b>                                                     | -17.20                   | -392.40                  | 5.23                    | 0.00                      | 0.00                     | -7.09                     | 404.077                      | -27.01                  |
| <b><math>\alpha</math>-unsaturated aminocarboxylic acids</b> |                          |                          |                         |                           |                          |                           |                              |                         |
| <b>5</b>                                                     | -6.39                    | 260.30                   | 0.90                    | 0.00                      | 0.00                     | -5.32                     | -237.31                      | -24.97                  |
| <b>6</b>                                                     | -14.03                   | 69.78                    | 5.01                    | 0.00                      | 0.00                     | -5.55                     | -64.21                       | -19.06                  |
| <b>7</b>                                                     | -1.07                    | 258.78                   | 3.85                    | 0.00                      | 0.00                     | -6.97                     | -230.60                      | -26.12                  |
| <b>8</b>                                                     | 0.23                     | 258.32                   | 8.38                    | 0.00                      | 0.00                     | -7.73                     | -232.11                      | -27.09                  |
| <b>Control</b>                                               |                          |                          |                         |                           |                          |                           |                              |                         |
| <b>Trimethoprim</b>                                          | -29.52                   | -533.48                  | 1.36                    | 0.00                      | 0.00                     | -5.40                     | 533.25                       | -25.25                  |
| <b>Ciprofloxacin</b>                                         | -36.19                   | -205.91                  | 2.58                    | 0.00                      | 0.00                     | -6.48                     | 197.18                       | -22.34                  |

$\Delta G_{\text{Bind}}$ : Binding free Energy;  $\Delta G_{\text{Coul}}$ : Coulomb or Electrostatics Interaction energy;  $\Delta G_{\text{cov}}$ : Covalent bonding correction,  $\Delta G_{\text{Hbond}}$ : Hydrogen-bonding correction,  $\Delta G_{\text{Pack}}$ :  $\pi$ - $\pi$  packing correction,  $\Delta G_{\text{lipho}}$ : Lipophilic Interaction energy,  $\Delta G_{\text{Solv\_GB}}$ : Generalized Born electrostatic solvation energy,  $\Delta G_{\text{vdW}}$ : Van der Waals Interaction energy.

# ADMET properties

**Table S2:** Range and recommended value(s) of ADMET properties

| Property                  | Description                                                                                                                                                                  | Range or recommended value (s) |
|---------------------------|------------------------------------------------------------------------------------------------------------------------------------------------------------------------------|--------------------------------|
| Mw                        | Molecular weight (MW in g/mol)                                                                                                                                               | 130.0 – 725.0                  |
| #Stars                    | Number of property or descriptor values that fall outside the 95% range of similar values for known drugs.                                                                   | 0 – 5                          |
| WPSA                      | Weakly polar component of the SASA (halogens, P, and S).                                                                                                                     | 0.0 – 175.0                    |
| volume (Å <sup>3</sup> )  | Total solvent-accessible volume in cubic angstroms using a probe with a 1.4 Å radius.                                                                                        | 500.0 – 2000.0                 |
| QPpolrz (Å <sup>3</sup> ) | Predicted polarizability in cubic angstroms                                                                                                                                  | 13.0 – 70.0                    |
| EA (eV)                   | Calculated electron affinity                                                                                                                                                 | –0.9 – 1.7                     |
| QPlogPoct                 | Predicted octanol/gas partition coefficient.                                                                                                                                 | 8.0– 35.0                      |
| QPlogPw                   | Predicted water/gas partition coefficient.                                                                                                                                   | 4.0 – 45.0                     |
| QPlogPo/w                 | Predicted octanol/water partition coefficient.                                                                                                                               | –2.0 – 6.5                     |
| QPlogS                    | Predicted aqueous solubility, log S. S in mol dm <sup>–3</sup> is the concentration of the solute in a saturated solution that is in equilibrium with the crystalline solid. | –6.5 – 0.5                     |
| QPPCaco (nm/sec)          | Predicted apparent Caco-2 cell permeability in nm/sec. Caco-2 cells are a model for the gut-blood barrier.                                                                   | <25 poor, >500 great           |
| #metab                    | Number of likely metabolic reactions                                                                                                                                         | 1 – 8                          |
| %Human Oral Absor         | Predicted human oral absorption on 0 to 100% scale                                                                                                                           | >80% is high <25% is poor      |
| PSA                       | Van der Waals surface area of polar nitrogen and oxygen atoms.                                                                                                               | 7.0 – 200.0                    |

|              |                                                    |   |
|--------------|----------------------------------------------------|---|
| Rule of 3    | Number of violations of Jorgensen's rule of three. | 0 |
| Rule Of Five | Number of violations of Lipinski's rule of five    | 4 |

#### Reference

[1] R. Iakovenko, J. Hlaváč, Visible light-mediated metal-free double bond deuteration of substituted phenylalkenes, *Green Chemistry*, 23 (2021) 440-446.
